# Supplementary material
Source: publisher figshare collection journal article supplement (https://gsajournals.figshare.com/ndownloader/files/13477061)
Supplement: Supplementary file 1 [file 13477061]

**Table S6.** Association of the Ventriup marker with stripe rust resistance.

| **Phenotype** | **P-value** | **FDR** |
| --- | --- | --- |
| GH_2010_YR_SD | 5.76E-11 | 1.87E-08 |
| ROS_2010_YR_IT2 | 9.80E-06 | 0.0031 |
| ROS_2010_YR_SV2 | 0.00118 | 0.071 |
| ROS_2011_YR_IT2 | 3.74E-06 | 0.0012 |
| TEX_2012_YR_IT | 3.17E-07 | 0.0001 |
